# Supplementary material
Source: publisher figshare collection journal article supplement (https://acs.figshare.com/ndownloader/files/4560628)
Supplement: Supplementary file 1 [file 4560628]

## Supporting Information

### Multimetallic arrays: Bi-, tri-, tetra- and hexametallic complexes based on gold(I) and gold(III) and the surface functionalisation of gold nanoparticles with transition metals.

Edward R. Knight,<sup>a</sup> Nina H. Leung<sup>a</sup> Amber L. Thompson,<sup>a</sup> G. Hogarth<sup>b</sup>  
and James D. E. T. Wilton-Ely<sup>a,c</sup> \*

*a) Chemistry Research Laboratory, University of Oxford, Mansfield Road, Oxford OX1 3TA, UK.*

*b) Department of Chemistry, University College London, 20 Gordon Street, London WC1H 0AJ, UK. c) Department of Chemistry, Imperial College London, South Kensington Campus, London SW7 2AZ, UK. E-mail: j.wilton-ely@imperial.ac.uk*

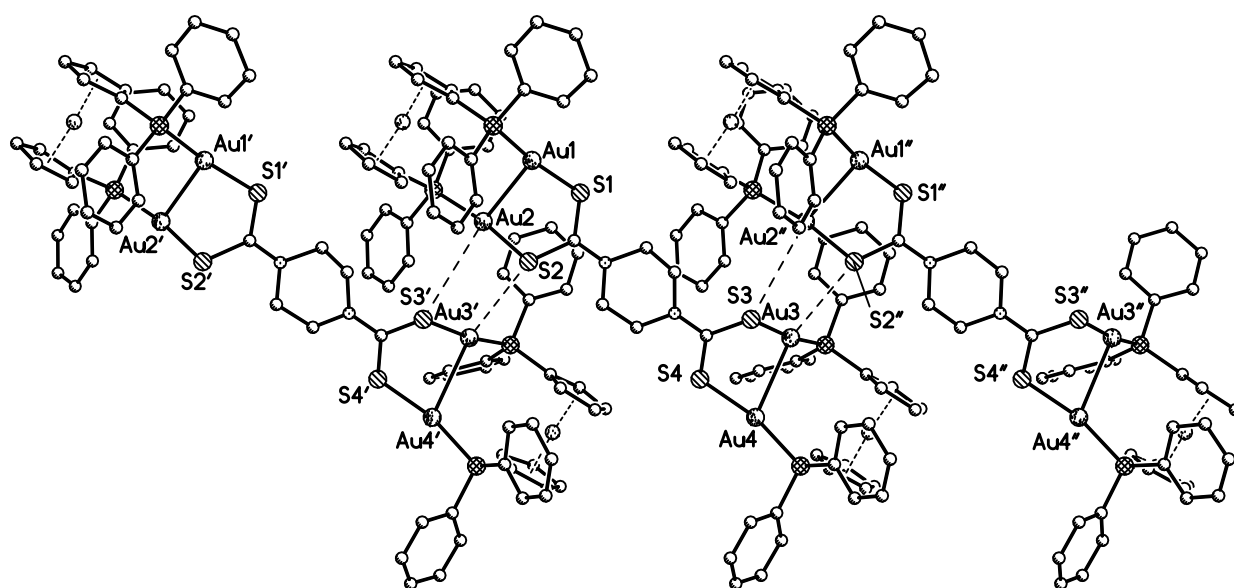

Fig. A. Illustration of packing in the solid state in **3**. The intermolecular gold-sulfur distances are Au2-S3 = 4.155(2), Au3-S2 = 3.585(2) Å.

The dithiocarbamate complex  $[(\text{dppm})\text{Au}_2(\text{S}_2\text{CNC}_4\text{H}_8\text{NH}_2)]^{2+}$  was considered to be a potentially useful starting point for further reactions, however, reaction of  $[(\text{dppm})(\text{AuCl})_2]$  with the zwitterion  $\text{S}_2\text{CNC}_4\text{H}_8\text{NH}_2$  led to isolation of the previously reported bimetallic complex

$[\{(dppm)Au_2\}_2(S_2CNC_4H_8NCS_2)](PF_6)_2$ . Such symmetrization behavior has also been observed by us in some palladium and platinum compounds.<sup>22</sup> It was not initially clear that the complex formed was the same as that reported earlier<sup>18</sup> so single crystals of the product were grown from slow diffusion of ethanol into a dichloromethane solution of the complex.

The crystal structure obtained from the symmetrisation of showed a similar cyclic  $Au_{16}$  structure. However, in contrast to that reported previously, the structure was not found to be chiral and is a polymorph (Fig. B).

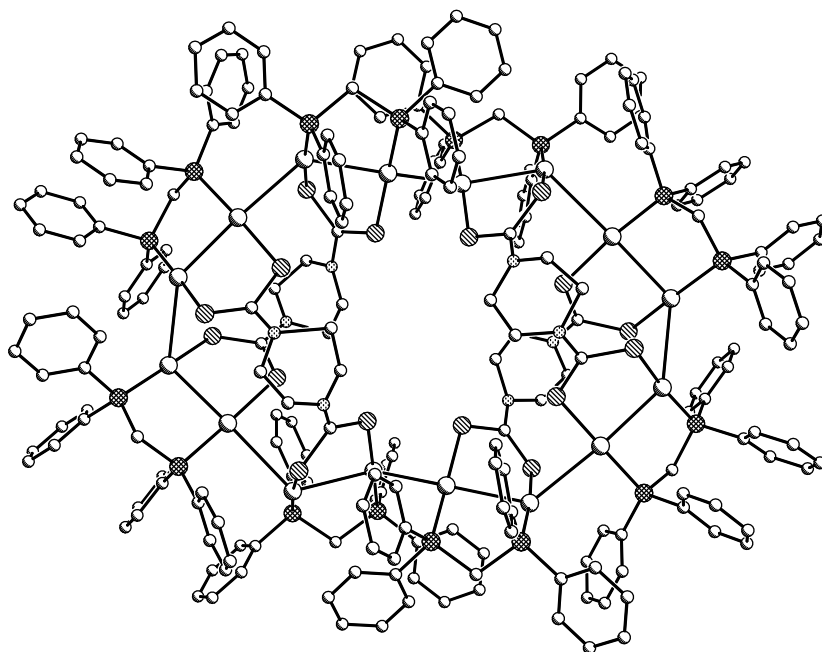

Fig. B. Molecular structure of  $[\{(dppm)Au_2\}_2(S_2CNC_4H_8NCS_2)](PF_6)_2$ .

Cell parameters:  $a = 24.397(9) \text{ \AA}$ ,  $b = 25.948(16) \text{ \AA}$ ,  $c = 27.854(17) \text{ \AA}$ ,  $\alpha = 67.77(7)^\circ$ ,  $\beta = 75.72(5)^\circ$ ,  $\gamma = 63.95(5)^\circ$ ,  $V = 14595(14) \text{ \AA}^3$ , Space group =  $P \bar{1}$ .
